# Supplementary material
Source: Springer Nature journal article supplement (https://www.springermedizin.de/resource/supplementary/13041_2009_69_MOESM3_ESM.pdf/25657532)

# A. ADCY8

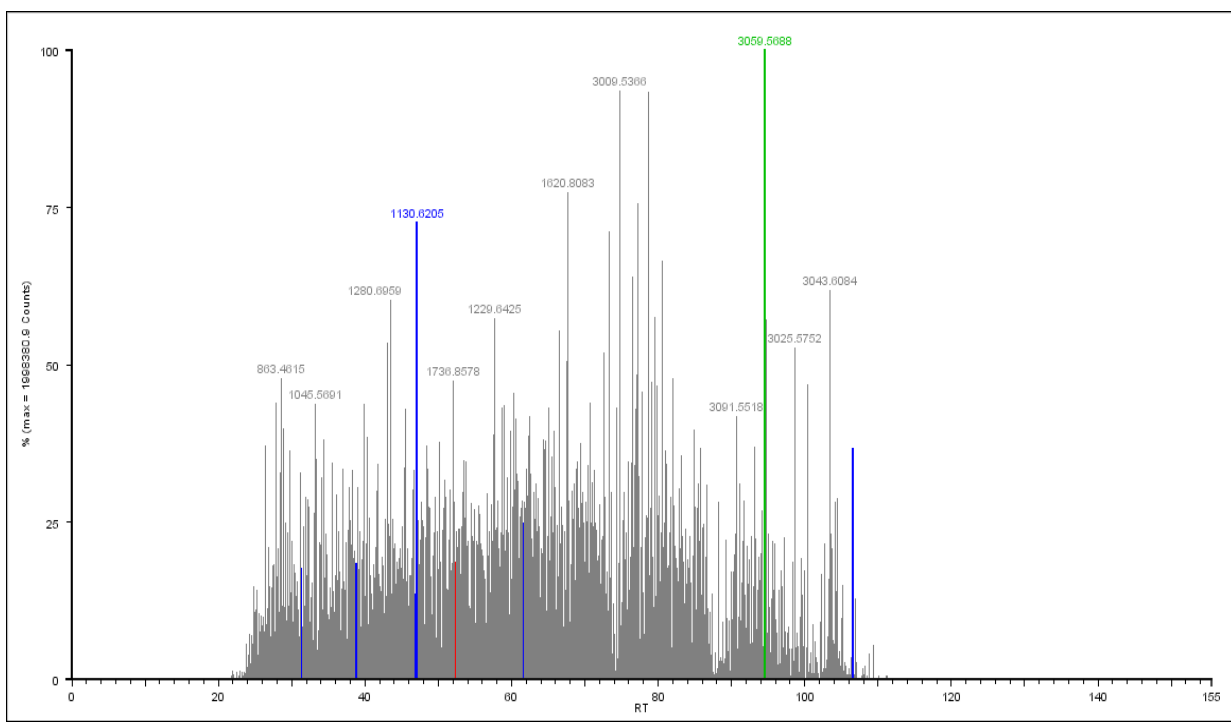

# B. MEKK1

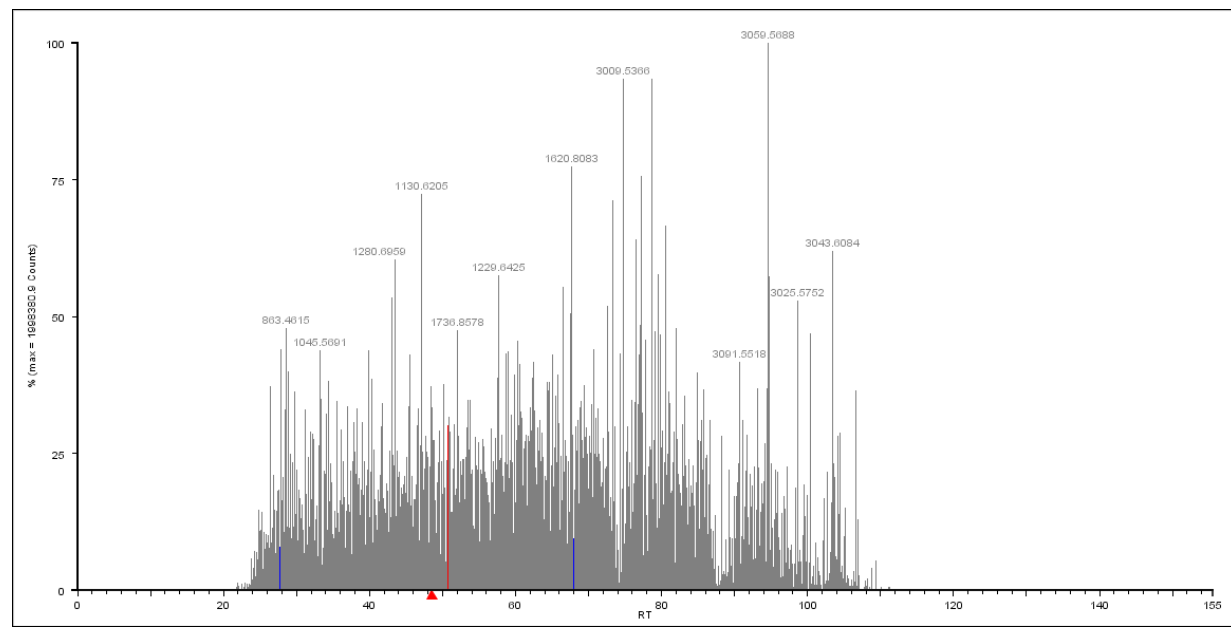

Supplement: MOESM3 [file 25657532]
